# Supplementary material
Source: Springer Nature journal article supplement (https://www.springermedizin.de/resource/supplementary/12936_2010_1237_MOESM3_ESM.pdf/9549304)

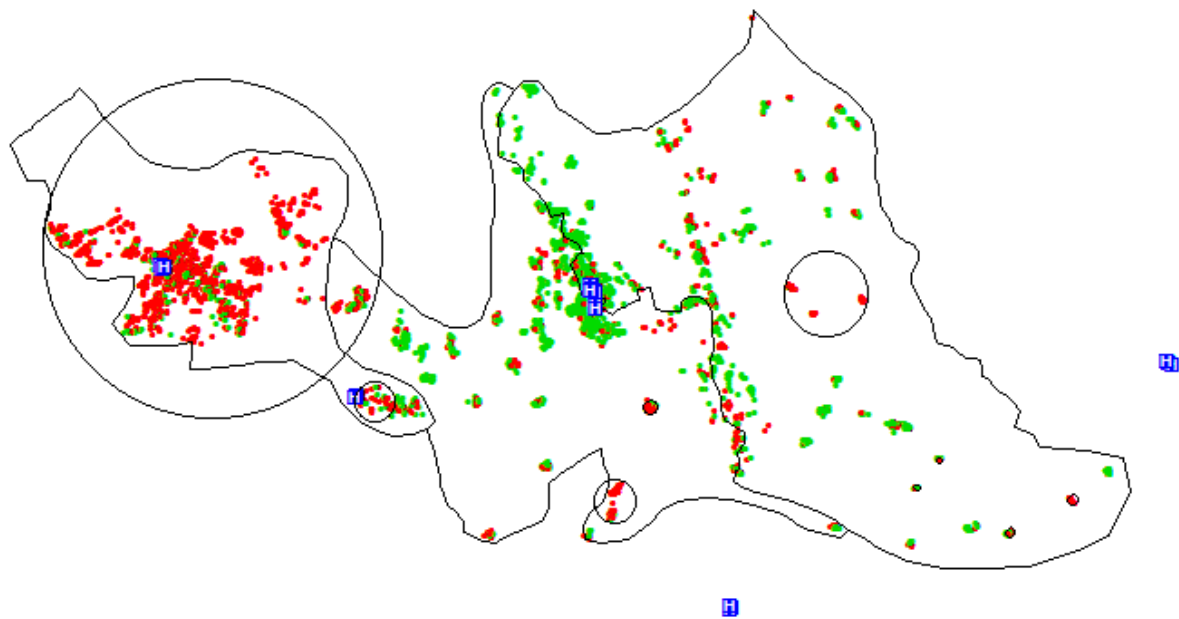

## Legend

 Boundary

 Pharmacy

 Preferred other health services for treatment

 Preferred drug vendor for treatment

 Pharmacy

0 3 6 12  
Kilometers

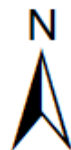

Supplement: MOESM3 [file 9549304]
